# Supplementary material
Source: MDPI journal article supplement (https://www.mdpi.com/1999-4907/13/1/78)
Supplement: s1 [file s1]

**Table S1.** Sample size (N), region, geographic coordinates, altitudes and bioclimatic variables for seven studied *Taxus baccata* populations. Bioclimatic variables: BIO1 (Annual Mean Temperature); BIO2 (Mean Diurnal Range (Mean of monthly (max temp—min temp))); BIO3 (Isothermality (BIO2/BIO7) (×100)); BIO4 (Temperature Seasonality (standard deviation ×100)); BIO5 (Max Temperature of Warmest Month); BIO6 (Min Temperature of Coldest Month); BIO7 (Temperature Annual Range (BIO5-BIO6)); BIO8 (Mean Temperature of Wettest Quarter); BIO9 (Mean Temperature of Driest Quarter); BIO10 (Mean Temperature of Warmest Quarter); BIO11 (Mean Temperature of Coldest Quarter); BIO12 (Annual Precipitation); BIO13 (Precipitation of Wettest Month); BIO14 (Precipitation of Driest Month); BIO15 (Precipitation Seasonality (Coefficient of Variation)); BIO16 (Precipitation of Wettest Quarter); BIO17 (Precipitation of Driest Quarter); BIO18 (Precipitation of Warmest Quarter); and BIO19 (Precipitation of Coldest Quarter). Populations: P01—Učka; P02—Senj; P03—Klek; P04—Bistra; P05—Horvatove stube; P06—Tisova peć; and P07—Strahinščica.

| Pop. ID | N  | Region      | Long   | Lat.   | Alt. | Bioclimatic variables |     |      |       |      |      |      |      |      |      |      |      |     |    |      |     |     |     |     |
|---------|----|-------------|--------|--------|------|-----------------------|-----|------|-------|------|------|------|------|------|------|------|------|-----|----|------|-----|-----|-----|-----|
|         |    |             |        |        |      | 1                     | 2   | 3    | 4     | 5    | 6    | 7    | 8    | 9    | 10   | 11   | 12   | 13  | 14 | 15   | 16  | 17  | 18  | 19  |
| P01     | 15 | Dinaric     | 15.000 | 44.927 | 1033 | 7.0                   | 8.3 | 33.6 | 628.9 | 19.1 | -5.5 | 24.6 | 3.9  | 15.1 | 15.1 | -0.1 | 1565 | 196 | 78 | 24.9 | 527 | 304 | 304 | 381 |
| P02     | 15 | Dinaric     | 14.168 | 45.315 | 334  | 10.5                  | 8.6 | 33.3 | 648.1 | 22.8 | -3.1 | 25.9 | 7.1  | 16.5 | 18.7 | 3.0  | 1289 | 155 | 72 | 22.8 | 428 | 271 | 280 | 308 |
| P03     | 15 | Dinaric     | 15.143 | 45.260 | 1007 | 7.3                   | 8.6 | 33.8 | 643.1 | 19.6 | -5.9 | 25.5 | 7.7  | 0.4  | 15.4 | -0.3 | 1543 | 179 | 96 | 20.1 | 487 | 311 | 350 | 336 |
| P04     | 15 | Continental | 15.917 | 45.909 | 344  | 9.7                   | 8.7 | 29.5 | 721.1 | 23.5 | -6.0 | 29.5 | 18.5 | 2.3  | 18.5 | 0.8  | 1011 | 112 | 52 | 23.1 | 310 | 172 | 310 | 179 |
| P05     | 15 | Continental | 15.966 | 45.919 | 719  | 8.8                   | 7.9 | 29.0 | 696.5 | 21.5 | -5.6 | 27.1 | 17.5 | 1.6  | 17.5 | 0.3  | 1116 | 125 | 56 | 22.4 | 340 | 192 | 340 | 200 |
| P06     | 15 | Continental | 16.009 | 45.902 | 376  | 9.4                   | 8.3 | 29.6 | 701.3 | 22.6 | -5.4 | 28.0 | 18.1 | 2.1  | 18.1 | 0.8  | 1059 | 116 | 54 | 21.9 | 321 | 184 | 321 | 189 |
| P07     | 15 | Continental | 15.914 | 46.195 | 527  | 9.0                   | 8.6 | 30.2 | 715.7 | 22.4 | -6.2 | 28.6 | 17.8 | 1.6  | 17.8 | 0.2  | 1107 | 127 | 52 | 24.1 | 348 | 187 | 348 | 190 |
